# Supplementary material
Source: PubMed Central journal article supplement (PMC4049098)
Supplement: NIHMS572783-supplement-303167R2_Acknowledgment_Permissions.pdf [file NIHMS572783-supplement-303167R2_Acknowledgment_Permissions.pdf]

## Circulation Research

---

**From:** Hanvey, Hillary M <HMHanvey@uams.edu>  
**Sent:** Tuesday, February 25, 2014 3:25 PM  
**To:** circulation.research@circresearch.com  
**Subject:** FW: Permission for acknowledgement in Circ Res manuscript  
**Attachments:** Moore et al Circ Res 022514.pdf; Moore et al Supplemental Material.pdf

To Whom It May Concern:

I give my permission to be acknowledged in the manuscript CIRCRES/2013/303167DR1: PKA-phosphorylated Kv1 channels in PSD95 signaling complex contribute to the resting membrane potential and diameter of cerebral arteries by Moore et al. A copy of the manuscript is attached.

Thank you,

Hillary Hanvey  
Research Technician - Rhee Lab  
Dept. of Pharmacology and Toxicology  
University of Arkansas for Medical Sciences  
4301 W Markham St Slot 611, Little Rock, AR 72205  
Tel (501) 686-8926, Fax (501) 686-5521

---

**From:** Rhee, Sung  
**Sent:** Tuesday, February 25, 2014 1:56 PM  
**To:** Hanvey, Hillary M  
**Subject:** Permission for acknowledgement in Circ Res manuscript

Hi, Hillary

As I mentioned, Circulation Research is asking for a direct email from you for the permission to acknowledge you in our manuscript attached in this email. You will find your name mentioned in the acknowledgement section on page 11.

Could you please email the journal at the following address with your permission to be acknowledged in the manuscript CIRCRES/2013/303167DR1: PKA-phosphorylated K<sub>v</sub>1 channels in PSD95 signaling complex contribute to the resting membrane potential and diameter of cerebral arteries by Moore et al?

[circulation.research@circresearch.com](mailto:circulation.research@circresearch.com)

Thanks!

Sung W. Rhee, PhD  
Associate Professor  
<http://pharmtox.uams.edu/rhee>  
Dept of Pharmacology and Toxicology  
Univ of Arkansas for Med Sciences  
4301 W Markham St Slot 638, Little Rock, AR 72205  
Tel (501) 686-5467, Fax (501) 686-8970

---

Confidentiality Notice: This e-mail message, including any attachments, is for the sole use of the intended recipient(s) and may contain confidential and privileged information. Any unauthorized review, use, disclosure or distribution is prohibited. If you are not the intended recipient, please contact the sender by reply e-mail and destroy all copies of the original message.

## Circulation Research

---

**From:** Alex Fedinec <afedinec@uthsc.edu>  
**Sent:** Thursday, February 27, 2014 3:53 AM  
**To:** circulation.research@circresearch.com  
**Subject:** permission for manuscript CIRCRES/2013/303167DR1

To whom it may concern,

I Alex Fedinec give permission to be acknowledged in the manuscript CIRCRES/2013/303167DR1.

Thank you,

Mr. Alexander L. Fedinec  
Laboratory Manager  
Dept. of Physiology  
University of Tennessee Center for Health Sciences  
894 Union Ave. Memphis, TN 38163  
Tel (901) 448-7112

## Circulation Research

---

**From:** Charles Leffler <cleffler@uthsc.edu>  
**Sent:** Thursday, February 27, 2014 11:20 AM  
**To:** circulation.research@circresearch.com  
**Cc:** Sung Rhee  
**Subject:** I give permission to be acknowledged in CIRCRES/2013/303167DR1

I give permission to be acknowledged in CIRCRES/2013/303167DR1

*Charles W. Leffler, Ph.D.  
UTHSC Distinguished Professor  
Departments of Physiology  
and Pediatrics  
U of Tennessee Health Science Center  
Memphis, TN 38163  
tel: 901-448-7122  
fax: 901-448-7126*
